# Supplementary material for: Box–Behnken Design-Based Optimization of Phytochemical Extraction from Diplazium esculentum (Retz.) Sw. Associated with Its Antioxidant and Anti-Alzheimer’s Properties
Source: MDPI journal article supplement (doi:10.3390/molecules29102204), 2024-05-08

## Supplementary Materials

# Box–Behnken Design-Based Optimization of Phytochemical Extraction from *Diplazium esculentum* (Retz.) Sw. Associated with Its Antioxidant and Anti-Alzheimer's Properties

Sirawit Kongsung <sup>1</sup>, Woorawee Inthachat <sup>2</sup>, Boonrat Chantong <sup>3</sup>, Uthaiwan Suttisansanee <sup>2</sup>, Nattira On-Nom <sup>2</sup>, Chaowanee Chupeerach <sup>2</sup>, Sirinapa Thangsiri <sup>2</sup>, Pornsiri Pitchakarn <sup>4,\*</sup> and Piya Temviriyanyukul <sup>1,\*</sup>

<sup>1</sup> Master of Science Program in Toxicology and Nutrition for Food Safety, Institute of Nutrition, Mahidol University, Nakhon Pathom 73170, Thailand; sirawit.kon@student.mahidol.ac.th (S.K.)

<sup>2</sup> Institute of Nutrition, Mahidol University, Salaya, Phuttamonthon, Nakhon Pathom 73170, Thailand; woorawee.int@mahidol.ac.th (W.I.); uthaiwan.sut@mahidol.ac.th (U.S.); nattira.onn@mahidol.ac.th (N.O.); chaowanee.chu@mahidol.ac.th (C.C.); sirinapa.tha@mahidol.ac.th (S.T.)

<sup>3</sup> Department of Pre-clinical and Applied Animal Science, Faculty of Veterinary Science, Mahidol University, Salaya, Phutthamonthon, Nakhon Pathom 73170, Thailand.; boonrat.cha@mahidol.ac.th (B.C.)

<sup>4</sup> Department of Biochemistry, Faculty of Medicine, Chiang Mai University, Chiang Mai 50200, Thailand.; pornsiri.p@cmu.ac.th (P.P.)

\* Correspondence: pornsiri.p@cmu.ac.th (P.P.) and piya.tem@mahidol.ac.th (P.T.)

Supplementary Table S1:

Fragment ions of twenty-six phenolic standards using liquid chromatography–electrospray ionization–tandem mass spectrometry (LC-ESI-MS/MS). The validation data were obtained from our previous works (Sirichai et.al., 2022 and Koirala et al., 2024).

| Compounds | Standards                 | Ion mass | Parent ions ( <i>m/z</i> ) | SRM transitions ( <i>m/z</i> ) and collision energy (V) | RF lens (V) |
|-----------|---------------------------|----------|----------------------------|---------------------------------------------------------|-------------|
| 1         | Epigallocatechin gallate  | [M–H]    | 457.175                    | 305.155 (16.84 V), 168.97 (17.59 V), 125.042 (40.30 V)  | 204         |
| 2         | Gallic acid               | [M–H]    | 169.05                     | 124.988 (14.56 V), 96.917 (18.77 V), 79.185 (22.94 V)   | 147         |
| 3         | 3,4-Dihydroxybenzoic acid | [M–H]    | 152.95                     | 109.113 (14.35 V), 81.042 (20.50 V), 91.042 (24.59 V)   | 128         |
| 4         | Chlorogenic acid          | [M–H]    | 353.075                    | 179.042 (14.06 V), 191.000 (16.54 V), 85.095 (39.96 V)  | 148         |
| 5         | 4-Hydroxybenic acid       | [M–H]    | 137.05                     | 92.970 (14.86 V), 65.000 (29.39 V), 75.000 (31.96 V)    | 110         |
| 6         | Caffeic acid              | [M–H]    | 179.038                    | 135.054 (15.07 V), 107.071 (22.57 V), 85.042 (31.96 V)  | 151         |
| 7         | Syringic acid             | [M–H]    | 197.138                    | 182.185 (13.72 V), 167.113 (19.24 V), 123.095 (22.31 V) | 130         |
| 8         | Vanillic acid             | [M–H]    | 167.000                    | 123.042 (11.66 V), 151.97 (14.59 V), 108.042 (18.65 V)  | 114         |
| 9         | <i>p</i> -Coumaric acid   | [M+H]    | 165.05                     | 147.054 (11.70 V), 119.113 (19.36 V), 91.125 (25.89 V)  | 90          |
| 10        | Rutin                     | [M+H]    | 611.20                     | 303.13 (20.80), 465.20 (12.71V)                         | 198         |
| 11        | Sinapic acid              | [M–H]    | 223.25                     | 208.125 (13.51 V), 164.024 (15.78 V), 192.970 (22.65 V) | 141         |
| 12        | Ferulic acid              | [M–H]    | 192.95                     | 149.125 (11.28 V), 177.970 (13.05 V), 134.042 (16.50 V) | 124         |
| 13        | Hesperidin                | [M–H]    | 609.30                     | 301.179 (24.50 V), 325.179 (27.83 V), 286.125 (41.60 V) | 299         |
| 14        | Myricetin                 | [M–H]    | 317.088                    | 178.970 (19.53 V), 150.988 (24.50 V), 137.113 (26.86 V) | 245         |
| 15        | Rosmarinic acid           | [M–H]    | 359.20                     | 197.000 (15.70 V), 161.113 (17.38 V), 133.054 (37.81 V) | 175         |
| 16        | Luteolin                  | [M–H]    | 285.138                    | 197.000 (15.70 V), 161.113 (17.38 V), 133.054 (37.81 V) | 241         |
| 17        | Quercetin                 | [M–H]    | 301.200                    | 178.976 (18.18 V), 273.125 (19.45 V), 151.042 (21.39 V) | 237         |
| 18        | Cinnamic acid             | [M–H]    | 147.00                     | 103.00 (11.23V), 77.083 (23.07)                         | 107         |
| 19        | Apigenin                  | [M–H]    | 269.075                    | 116.863 (34.28 V), 149.071 (25.13 V), 151.131 (25.05 V) | 244         |
| 20        | Genistein                 | [M–H]    | 269.138                    | 224.054 (25.60 V), 159.054 (29.26 V), 132.929 (30.95 V) | 239         |
| 21        | Naringenin                | [M+H]    | 272.938                    | 146.97 (21.01 V), 153.054 (24.42 V), 119.000 (31.28 V)  | 160         |

Supplementary Table S1 (Cont.):

Fragment ions of twenty-six phenolic standards using liquid chromatography–electrospray ionization–tandem mass spectrometry (LC-ESI-MS/MS). The validation data were obtained from our previous works (Sirichai et.al., 2022 and Koirala et al., 2024).

| Compounds | Standards    | Ion mass | Parent ions ( <i>m/z</i> ) | SRM transitions ( <i>m/z</i> ) and collision energy (V) | RF lens (V) |
|-----------|--------------|----------|----------------------------|---------------------------------------------------------|-------------|
| 22        | Kaempferol   | [M–H]    | 285.150                    | 184.911 (25.85 V), 239.113 (27.03 V), 186.988 (28.17 V) | 260         |
| 23        | Isorhamnetin | [M–H]    | 315.088                    | 300.000 (21.30 V), 150.970 (29.14 V), 271.054 (30.57 V) | 233         |
| 24        | Galangin     | [M+H]    | 271.088                    | 165.042 (28.80 V), 197.125 (31.75 V), 153.113 (32.42 V) | 248         |
| 25        | Fisetin      | [M+H]    | 287.050                    | 213.054 (27.96V), 137.042 (30.86V), 241.125 (25.09V)    | 244         |
| 26        | Mangiferin   | [M+H]    | 423.100                    | 273.054 (23.58V), 303.113 (17.7V), 327.071 (16.88V)     | 108         |

References:

Sirichai, P.; Kittibunchakul, S.; Thangsiri, S.; On-Nom, N.; Chupeerach, C.; Temviriyankul, P.; Inthachai, W.; Nuchuchua, O.; Aursalung, A.; Sahasakul, Y.; et al. Impact of Drying Processes on Phenolics and In Vitro Health-Related Activities of Indigenous Plants in Thailand. *Plants* 2022, 11, 294. <https://doi.org/10.3390/plants11030294>.

Koirala P, Chunhavacharatorn P, Suttisansanee U, Benjakul S, Katewongsa K, Al-Asmari F, Nirmal N. Antioxidant and antimicrobial activities of mango peel and radish peel-a comparative investigation. *Front. Sustain. Food Syst.* 2024; 8:1354393. doi: 10.3389/fsufs.2024.1354393.

Supplementary Table S2:

The validation parameters of twenty-six phenolic standards using liquid chromatography–electrospray ionization–tandem mass spectrometry (LC-ESI-MS/MS) .The validation data were obtained from our previus work (Sirichai et.al., 2022 and Koirala et al., 2024).

| Compounds | Retention<br>time<br>(min) | Standards                 | Linear<br>range<br>(µg/mL) | Linear regression<br>equation | Correlation<br>coefficient<br>(R <sup>2</sup> ) | LOD<br>(µg/mL) | LOQ<br>(µg/mL) | %RSD<br>(Inter-<br>day) | %Recovery               |                            |                          |
|-----------|----------------------------|---------------------------|----------------------------|-------------------------------|-------------------------------------------------|----------------|----------------|-------------------------|-------------------------|----------------------------|--------------------------|
|           |                            |                           |                            |                               |                                                 |                |                |                         | Low<br>level<br>(µg/mL) | Medium<br>level<br>(µg/mL) | High<br>level<br>(µg/mL) |
| 1         | 0.44                       | Epigallocatechin gallate  | 0.125–40                   | y =8533x + 1053.4             | 0.9985                                          | 0.067          | 0.230          | 0.023                   | 91.84                   | 85.36                      | 91.37                    |
| 2         | 0.564                      | Gallic acid               | 0.195–25                   | y =3323.1x – 2100.4           | 0.9984                                          | 0.04           | 0.14           | 0.01                    | 113.05                  | 118.57                     | 109.12                   |
| 3         | 0.803                      | 3,4-Dihydroxybenzoic acid | 0.195–25                   | y =11490x – 10877             | 0.9935                                          | 0.010          | 0.034          | 0.003                   | 90.59                   | 85.75                      | 89.75                    |
| 4         | 0.922                      | Chlorogenic acid          | 0.3125–40                  | y =8377.5x – 3623.5           | 0.9934                                          | 0.017          | 0.055          | 0.006                   | 91.94                   | 87.50                      | 95.02                    |
| 5         | 1.16                       | 4-Hydroxybenic acid       | 0.3125–40                  | y =2482.6x– 3998.4            | 0.9917                                          | 0.027          | 0.090          | 0.009                   | 109.67                  | 103.60                     | 101.28                   |
| 6         | 1.40                       | Caffeic acid              | 0.3125–40                  | y =12328x–19725               | 0.9918                                          | 0.010          | 0.035          | 0.003                   | 105.36                  | 93.98                      | 87.41                    |
| 7         | 1.539                      | Syringic acid             | 3.125–100                  | y =68.091x + 230.43           | 0.9955                                          | 0.582          | 1.939          | 0.194                   | 116.35                  | 97.42                      | 94.91                    |
| 8         | 1.63                       | Vanillic acid             | 2.5–100                    | y =213.67x – 975.72           | 0.9900                                          | 0.15           | 0.48           | 0.05                    | 99.86                   | 101.76                     | 100.12                   |
| 9         | 2.452                      | <i>p</i> -Coumaric acid   | 0.3125–40                  | y =8532.4x–13559              | 0.9910                                          | 0.013          | 0.042          | 0.004                   | 88.22                   | 81.36                      | 98.05                    |
| 10        | 2.737                      | Rutin                     | 0.009–1.25                 | y =49729x – 33.064            | 0.9999                                          | 0.001          | 0.005          | 0.0005                  | 94.63                   | 114.00                     | 108.73                   |
| 11        | 2.772                      | Sinapic acid              | 0.39–25                    | y =1592.6x – 832.22           | 0.9977                                          | 0.026          | 0.086          | 0.009                   | 81.34                   | 92.16                      | 84.22                    |
| 12        | 2.851                      | Ferulic acid              | 1.56–100                   | y =559.03x – 1819.2           | 0.9947                                          | 0.155          | 0.518          | 0.052                   | 91.51                   | 89.24                      | 93.10                    |
| 13        | 3.41                       | Hesperidin                | 0.25–40                    | y =838.63x – 242.2            | 0.9986                                          | 0.07           | 0.22           | 0.02                    | 100.43                  | 104.06                     | 108.60                   |
| 14        | 3.431                      | Myricetin                 | 1.25–40                    | y =303.47x – 601.81           | 0.9976                                          | 0.261          | 0.871          | 0.087                   | 113.07                  | 81.77                      | 91.12                    |
| 15        | 3.528                      | Rosmarinic acid           | 0.3125–40                  | y =4322.4x–3744.1             | 0.9956                                          | 0.07           | 0.25           | 0.02                    | 92.45                   | 106.35                     | 99.62                    |
| 16        | 4.158                      | Luteolin                  | 0.195–12.5                 | y =8381.9x – 5000.7           | 0.9945                                          | 0.015          | 0.050          | 0.0005                  | 84.21                   | 96.21                      | 107.09                   |
| 17        | 4.185                      | Quercetin                 | 0.05–12.5                  | y =2934x + 917.17             | 0.9937                                          | 0.05           | 0.18           | 0.02                    | 83.36                   | 115.06                     | 95.74                    |

Supplementary Table S2 (Cont.):

The validation parameters of twenty-six phenolic standards using liquid chromatography–electrospray ionization–tandem mass spectrometry (LC-ESI-MS/MS) .The validation data were obtained from our previus work (Sirichai et.al., 2022 and Koirala et al., 2024).

| Compounds | Retention<br>time<br>(min) | Standards     | Linear<br>range<br>(µg/mL) | Linear regression<br>equation | Correlation<br>coefficient<br>(R <sup>2</sup> ) | LOD<br>(µg/mL) | LOQ<br>(µg/mL) | %RSD<br>(Inter-<br>day) | %Recovery               |                            |                          |
|-----------|----------------------------|---------------|----------------------------|-------------------------------|-------------------------------------------------|----------------|----------------|-------------------------|-------------------------|----------------------------|--------------------------|
|           |                            |               |                            |                               |                                                 |                |                |                         | Low<br>level<br>(µg/mL) | Medium<br>level<br>(µg/mL) | High<br>level<br>(µg/mL) |
| 18        | 4.522                      | Cinnamic acid | 0.039–10                   | y =6631.9x – 866.59           | 0.9964                                          | 0.049          | 0.163          | 0.016                   | 101.94                  | 98.84                      | 95.85                    |
| 19        | 4.689                      | Apigenin      | 0.34–11                    | y =1790.7x – 287.7            | 0.9997                                          | 0.127          | 0.424          | 0.042                   | 88.84                   | 106.89                     | 114.79                   |
| 20        | 4.693                      | Genistein     | 0.625–40                   | y =1247.2x – 1747.1           | 0.9977                                          | 0.049          | 0.163          | 0.016                   | 95.33                   | 101.49                     | 11633                    |
| 21        | 4.705                      | Naringenin    | 0.0008–5                   | y =16755x + 443.03            | 0.9932                                          | 0.003          | 0.011          | 0.001                   | 117.92                  | 96.26                      | 111.08                   |
| 22        | 4.79                       | Kaempferol    | 0.25–10                    | y =1006.8x – 346.28           | 0.9905                                          | 0.122          | 0.406          | 0.041                   | 92.35                   | 107.69                     | 102.17                   |
| 23        | 4.878                      | Isorhamnetin  | 0.0098–2.5                 | y =12698x + 586.16            | 0.9945                                          | 0.016          | 0.052          | 0.005                   | 113.57                  | 105.88                     | 111.14                   |
| 24        | 6.146                      | Galangin      | 0.3125–40                  | y =5012.1x – 9354.7           | 0.9879                                          | 0.010          | 0.035          | 0.003                   | 84.01                   | 112.92                     | 115.80                   |
| 25        | 3.620                      | Fisetin       | 0.25–10                    | y =7468.4x – 701.27           | 0.9979                                          | 0.150          | 0.490          | 0.05                    | 98.01                   | 108.94                     | 117.51                   |
| 26        | 1.116                      | Mangiferin    | 0.125–10                   | y =7516.2x + 195.48           | 0.9985                                          | 0.040          | 0.130          | 0.01                    | 102.20                  | 91.14                      | 91.57                    |

References:

Sirichai, P.; Kittibunchakul, S.; Thangsiri, S.; On-Nom, N.; Chupeerach, C.; Temviriyankul, P.; Inthachai, W.; Nuchuchua, O.; Aursalung, A.; Sahasakul, Y.; et al. Impact of Drying Processes on Phenolics and In Vitro Health-Related Activities of Indigenous Plants in Thailand. *Plants* 2022, 11, 294. <https://doi.org/10.3390/plants11030294>.

Koirala P, Chunhavacharatorn P, Suttisansanee U, Benjakul S, Katewongsa K, Al-Asmari F, Nirmal N. Antioxidant and antimicrobial activities of mango peel and radish peel-a comparative investigation. *Front. Sustain. Food Syst.* 2024; 8:1354393. doi: 10.3389/fsufs.2024.1354393.

**Supplementary Table S3:** The list and sequences of primers used in the present study.

| <i>Drosophila</i> Genes | Primers | Sequences               |
|-------------------------|---------|-------------------------|
| dmATF-6                 | forward | TCCTTCAGCGTGTCTGGTG     |
|                         | reverse | TGGATAGACCGCCTCTTCGT    |
| dmBip                   | forward | ACCATCCCGAGGCATCAATC    |
|                         | reverse | GGTCAGTGGGTTACATCGAG    |
| dmGPx                   | forward | GGCCTGGTGATCCTCAACTTC   |
|                         | reverse | GATGTCAGCCTTGGAGTCGC    |
| dmGSTD1                 | forward | CTGAAGCCGGAGTTCCTGAAG   |
|                         | reverse | GGTCTTGCCGTA CTCTCCAC   |
| dmIRE-1                 | forward | CAATGCTCCCTGTCGTTCTCCTC |
|                         | reverse | CTAGATAGATGGCCCGCGAAG   |
| dmNCT                   | forward | GCCACCATCTCCACCTTAC     |
|                         | reverse | GTTCTTTGGTCCGGCTTCCT    |
| dmNEP-1                 | forward | ATCGCCTTTACCGTTCTGGG    |
|                         | reverse | TGTCATCGTTGTCTGGCTCC    |
| dmPEK or PERK           | forward | GGCACCCA ACTACTGATTCTG  |
|                         | reverse | CGACGCTCCTCCTGATCTAC    |
| dmRpL32                 | forward | AGATCGTGAAGAAGCGCACC    |
|                         | reverse | CGATCCGTAACCGATGTTGG    |
| dmSOD1                  | forward | CAATCCGTATGGCAAGGAGC    |
|                         | reverse | CGCCGAAGAGCGTAATCTTG    |

### Supplementary Figure S1:

Full liquid chromatography–electrospray ionization–tandem mass spectrometry (LC-ESI-MS/MS) chromatograms of the optimized *D. esculentum* extract (DE extract) presenting five detected compounds, including 1: rutin; 2: rosmarinic acid; 3: fisetin; 4: quercetin; and 5: kaempferol.

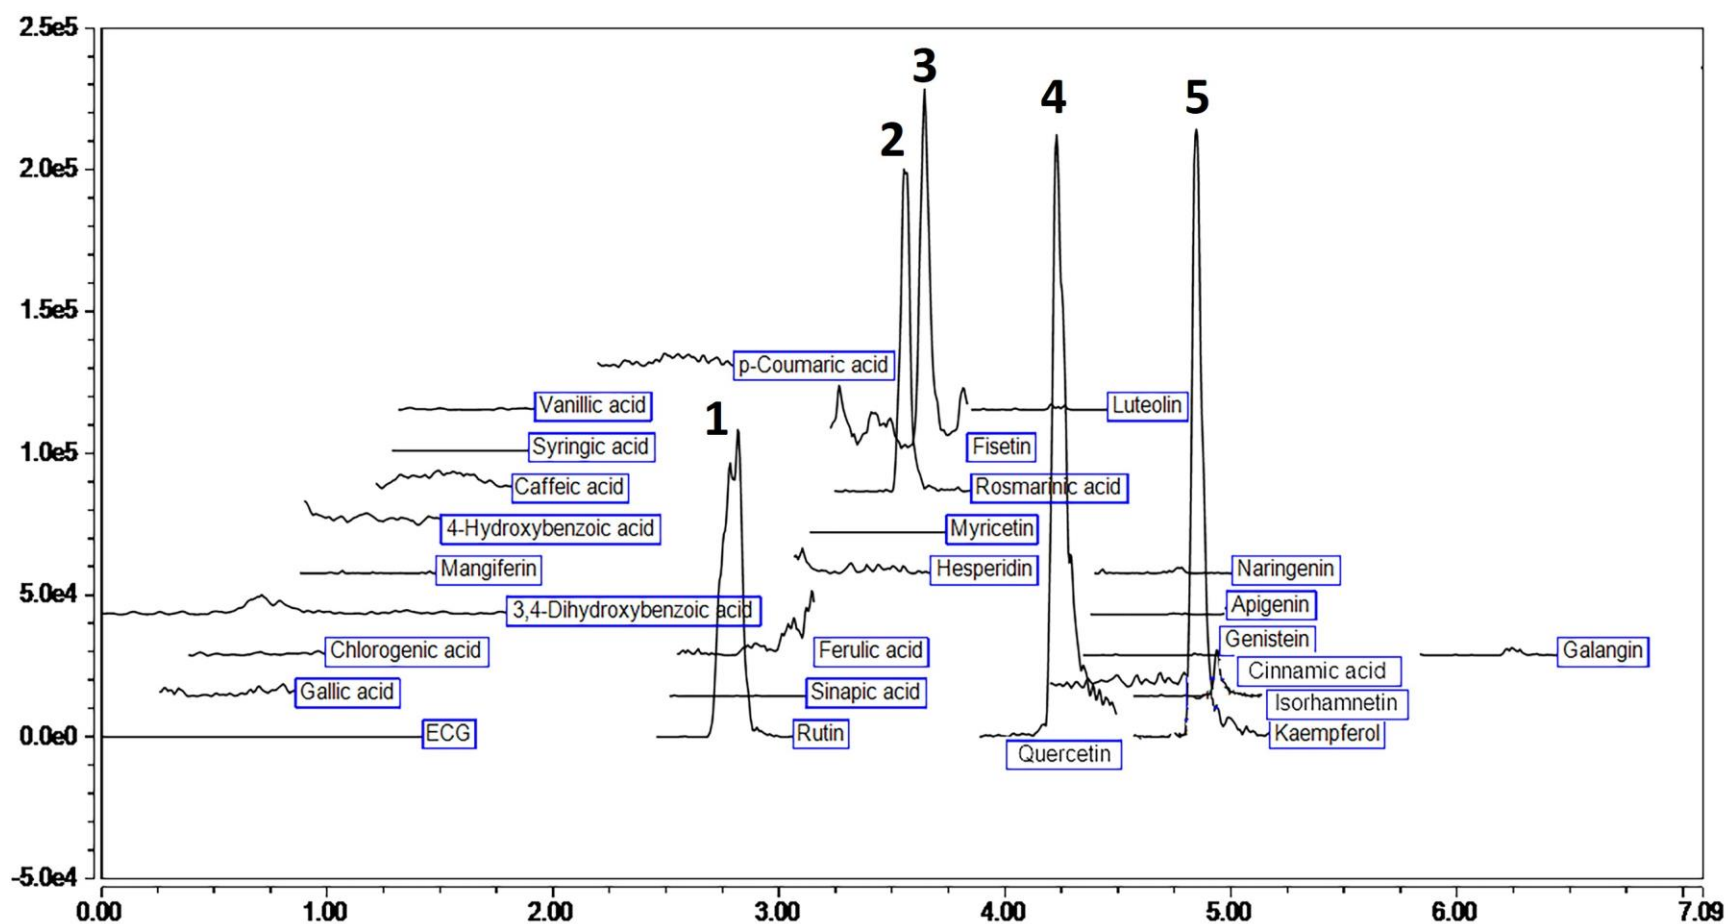

Supplement: s1 [file s1]
